# Supplementary material for: Characteristics of COPD in never-smokers and ever-smokers in the general population: results from the CanCOLD study
Source: HighWire-hosted journal article supplement (doi:10.1136/thoraxjnl-2015-206938), 2015-06-05

Supplementary file for the manuscript thoraxjnl-2015-206938.R1

**“Characteristics of COPD in Never-smokers and Ever-smokers in the general population: results from the CanCOLD study.”**

***Definitions***

1. **Occupational exposure** was evaluated by asking participants whether they had worked  $\geq$  3 months and the number of years spent in each occupation suspected to be associated with risk of COPD. For analysis, occupational exposure was grouped in 3 categories:
  - a. organic dust ( eg farming ; forestry and fish-processing);
  - b. inorganic (eg asbestos, hard rock mining);
  - c. irritant gases/fumes/vapours ( e.g firefighting, chemical or plastic manufacturing).
  
2. **A respiratory “exacerbation”** = Yes to question “ever had a period when breathing problems got so bad that they interfered with usual dailyactivities or resulted in missing work?”

***Spirometry Testing:***

Spirometry was performed by trained and certified technicians using the ndd Easyone spirometer ( ndd Medical Technologies, Zurich, Switzerland). before and 15 minutes after two puffs of salbutamol ( 200ug) administered from a metered dose inhaler via a volumatic spacer. The quality of all tests was reviewed centrally in the CanCOLD study pulmonary function reference center in Vancouver, Canada.

## Variables explained

| Variable                      | Explanation                                                                                                                                                                                                                                                                                                                                                                                                                                                                                                                                                                                                                                                                                                                                          |
|-------------------------------|------------------------------------------------------------------------------------------------------------------------------------------------------------------------------------------------------------------------------------------------------------------------------------------------------------------------------------------------------------------------------------------------------------------------------------------------------------------------------------------------------------------------------------------------------------------------------------------------------------------------------------------------------------------------------------------------------------------------------------------------------|
| Education                     | How many years of schooling have you completed?                                                                                                                                                                                                                                                                                                                                                                                                                                                                                                                                                                                                                                                                                                      |
| Childhood hospitalization     | Were you hospitalized as a child for breathing problems prior to the age of 10?                                                                                                                                                                                                                                                                                                                                                                                                                                                                                                                                                                                                                                                                      |
| HD/HT/DM                      | Has a doctor or other care provider ever told you that you had heart disease, hypertension or diabetes?                                                                                                                                                                                                                                                                                                                                                                                                                                                                                                                                                                                                                                              |
| Asthma                        | Has a doctor or other health care provider ever told you that you have asthma, asthmatic bronchitis or allergic bronchitis?                                                                                                                                                                                                                                                                                                                                                                                                                                                                                                                                                                                                                          |
| Pack years                    | # of packs ( 20 cigarettes/pack) per day multiplied by number of smoking years                                                                                                                                                                                                                                                                                                                                                                                                                                                                                                                                                                                                                                                                       |
| Pack years (categorical)      | 0=never, 1=0-<10, 2=10-<20, 3=20+                                                                                                                                                                                                                                                                                                                                                                                                                                                                                                                                                                                                                                                                                                                    |
| Organic dust                  | Have you ever worked for 3 months or more at any of the following occupation? Flour, feed or grain milling; cotton or jute processing; farming; forestry; saw-milling.                                                                                                                                                                                                                                                                                                                                                                                                                                                                                                                                                                               |
| Inorganic dust                | Have you ever worked for 3 months or more at any of the following occupation? Hard rock mining; coal mining; sandblasting; working with asbestos; foundry or steel milling.                                                                                                                                                                                                                                                                                                                                                                                                                                                                                                                                                                          |
| Gas/vapours                   | Have you ever worked for 3 months or more at any of the following occupation? Chemical or plastics manufacturing; welding; fire fighting; oil drilling; gas well.                                                                                                                                                                                                                                                                                                                                                                                                                                                                                                                                                                                    |
| Tuberculosis                  | Has a doctor or other care provider ever told you that you had tuberculosis?                                                                                                                                                                                                                                                                                                                                                                                                                                                                                                                                                                                                                                                                         |
| Chronic cough                 | Do you cough on most days for as much as three months each year and has this cough for more than 2 years?                                                                                                                                                                                                                                                                                                                                                                                                                                                                                                                                                                                                                                            |
| Chronic phlegm                | Do you bring up the phlegm on most days for as much as three months each year and has this phlegm for more than 2 years?                                                                                                                                                                                                                                                                                                                                                                                                                                                                                                                                                                                                                             |
| Wheeze                        | Have you had this wheezing or whistling in your chest at any time in the last 12 months?                                                                                                                                                                                                                                                                                                                                                                                                                                                                                                                                                                                                                                                             |
| Dysnoea score                 | Are you unable to walk due to a condition other than shortness of breath? If yes, no dysnea score. If no, dysnea score is 1. And answer the following questions: are you troubled by shortness of breath when hurrying on the level or walking up a slight hill? If yes, dyspnea score=2. Do you have a walk slower than people of your age on level ground because of shortness of breath or do you ever have to stop for breath when walking at your own pace on level ground? If yes, dyspnea score=3. Do you ever have to stop for breath after walking about 100 yards (or after a few minutes) on level ground? If yes, score=4. Are you too short of breath to leave the house or short of breath on dressing or undressing? If yes, score=5. |
| Dysnea on exertion            | If score $\geq 2$ then yes.                                                                                                                                                                                                                                                                                                                                                                                                                                                                                                                                                                                                                                                                                                                          |
| COPD                          | Has a doctor or other care provider ever told you that you had COPD?                                                                                                                                                                                                                                                                                                                                                                                                                                                                                                                                                                                                                                                                                 |
| Chronic bronchitis            | Has a doctor or other care provider ever told you that you had chronic bronchitis?                                                                                                                                                                                                                                                                                                                                                                                                                                                                                                                                                                                                                                                                   |
| Emphysema                     | Has a doctor or other care provider ever told you that you had emphysema?                                                                                                                                                                                                                                                                                                                                                                                                                                                                                                                                                                                                                                                                            |
| Stroke                        | Has a doctor or other care provider ever told you that you had stroke?                                                                                                                                                                                                                                                                                                                                                                                                                                                                                                                                                                                                                                                                               |
| Worked in any dusty job >1 yr | Have you ever worked for a year or more in a dusty job?                                                                                                                                                                                                                                                                                                                                                                                                                                                                                                                                                                                                                                                                                              |

## **Biomass fuel exposure**

Biomass fuel questionnaire used in this study was the same standardized and validated questionnaire that was used in the BOLD initiative and administered face-to-face by trained and accredited researcher coordinators according to the BOLD protocol for eliciting questionnaire responses, the results of which had been widely published. In this study, we had defined the presence of biomass fuel exposure for cooking and for heating in a conservative way as follows:

### **Biomass cooking:**

1. Has an indoor open fire with coal or coke been used in your home as a primary means of cooking for more than 6 months in your life?
2. For how many years has coal or coke been used for cooking in your home?
3. Has an indoor open fire with wood, crop residues or dung been used in your home as a primary means of cooking for more than 6 months in your life?
4. For how many years have wood, crop residues or dung been used for cooking in your home?

#### Code:

If Question1=yes **and** Question2>=9 **then** biomass cooking=yes; **or**

If Question3=yes **and** Question4>=9 **then** biomass cooking=yes.

**Otherwise** biomass cooking=no.

### **Biomass heating:**

1. Have you used an open fire with coal or coke as a primary means of heating your home for more than 6 months in your life?
2. For how many years have you used an open fire with coal or coke as a primary means of heating your home?
3. Have you used an open fire with wood, crop residues or dung as a primary means of heating your home for more than 6 months in your life?
4. For how many years have you used an open fire with wood, crop residues or dung as a primary means of heating your home?

#### Code:

If Question1=yes **and** Question2>=9 **then** biomass heating=yes; **or**

If Question3=yes **and** Question4>=9 **then** biomass heating=yes.

**Otherwise** biomass heating=no.

## **Statistic analysis- Holm-Bonferroni correction**

Multiple hypotheses testing was corrected using the Holm-Bonferroni correction (Ref: Van Bell G, Fisher L, Heagerty P, Lumley T. Multiple Comparisons In Biostatistics: A Methodology for the Health Sciences. 2 ed. Seattle, Washington: Wiley-Interscience, 2004). The Holm-Bonferroni adjusted p-values were determined by ordering p-values from smallest to largest, with the smallest p-value multiplied by k, where k is the number of hypotheses to be tested. If the resulting modified p-value was less than  $\alpha$  (Type I error rate) the hypothesis was rejected. The next smallest p-value was then multiplied by k-1 and the new modified p-value was compared to  $\alpha$ . This process was repeated until the modified p-value could not be rejected.

**Table S1 (complements Table 1 in manuscript):** Demographics of never smokers and ever smokers by sex.

|                                                   | Men                    |                        |                             | Women                   |                        |                             |                              |
|---------------------------------------------------|------------------------|------------------------|-----------------------------|-------------------------|------------------------|-----------------------------|------------------------------|
|                                                   | Never Smokers<br>n=891 | Ever Smokers<br>n=1205 | Adjusted<br>P* <sup>‡</sup> | Never Smokers<br>n=1404 | Ever Smokers<br>n=1393 | Adjusted<br>P* <sup>‡</sup> | Adjusted<br>P** <sup>‡</sup> |
| Sex(men)                                          | -                      | -                      | -                           | -                       | -                      | -                           | -                            |
| Ethnicity(Caucasian)                              | 803(90.1%)             | 1118(92.8%)            | 0.1485                      | 1216(86.6%)             | 1338(96.1%)            | 0.0015                      | 0.0936                       |
| Age, yr, mean±sd                                  | 56.1(11.0)             | 58.8(11.4)             | 0.0015                      | 57.1(11.3)              | 57.7(10.7)             | 0.3997                      | 0.2485                       |
| <b>Age</b>                                        |                        |                        | 0.0014                      |                         |                        | 0.8484                      | 0.4218                       |
| 40-49                                             | 296(33.2%)             | 306(25.4%)             | -                           | 406(28.9%)              | 366(26.3%)             | -                           | -                            |
| 50-59                                             | 284(31.9%)             | 352(29.2%)             | -                           | 466(33.2%)              | 459(33.0%)             | -                           | -                            |
| 60-69                                             | 190(21.3%)             | 316(26.2%)             | -                           | 311(22.2%)              | 358(25.7%)             | -                           | -                            |
| 70+                                               | 121(13.6%)             | 231(19.2%)             | -                           | 221(15.7%)              | 210(15.1%)             | -                           | -                            |
| BMI, kg/m <sup>2</sup> , mean±sd                  | 27.7(4.7)              | 28.3(5.0)              | 0.0351                      | 27.4(6.2)               | 28.3(6.7)              | 0.0132                      | 0.0015                       |
| Education, yr, mean±sd                            | 16.8(3.4)              | 15.0(3.7)              | 0.0013                      | 15.6(3.5)               | 14.6(3.3)              | 0.0014                      | 0.0014                       |
| Pack years>20                                     | -                      | 644(53.4%)             |                             | -                       | 587(42.1%)             |                             |                              |
| <b>Exposures</b>                                  |                        |                        |                             |                         |                        |                             |                              |
| Organic dust                                      | 118(13.2%)             | 166(13.8%)             | 1.0000                      | 84(6.0%)                | 77(5.5%)               | 0.6052                      | 0.0013                       |
| Inorganic dust                                    | 41(4.6%)               | 102(8.5%)              | 0.005                       | 5(0.4%)                 | 10(0.7%)               | 0.9515                      | 0.0012                       |
| Gases/Vapours                                     | 72(8.1%)               | 124(10.3%)             | 0.3436                      | 17(1.2%)                | 31(2.2%)               | 0.388                       | 0.0011                       |
| <i>Biomass fuel</i> <sup>#</sup>                  |                        |                        |                             |                         |                        |                             |                              |
| ≥10 years cooking                                 | 66(10.9%)              | 119(15.2%)             | 0.1337                      | 129(12.7%)              | 107(11.5%)             | 0.8216                      | 0.2196                       |
| ≥10 years heating                                 | 84(13.9%)              | 149(19.0%)             | 0.0848                      | 159(11.4%)              | 166(11.9%)             | 0.806                       | 0.2232                       |
| Passive smoking at home                           | 39(4.4%)               | 165(13.7%)             | 0.0012                      | 67(4.8%)                | 196(14.1%)             | 0.0013                      | 1.0000                       |
| Childhood hospitalization for respiratory illness | 56(6.3%)               | 80(6.6%)               | 0.7602                      | 55(3.9%)                | 93(6.7%)               | 0.0121                      | 0.0846                       |
| <b>Co-morbidities, ever</b>                       |                        |                        |                             |                         |                        |                             |                              |
| HD/HT/DM <sup>§</sup>                             | 287(32.2%)             | 534(44.3%)             | 0.0011                      | 441(31.4%)              | 465(33.4%)             | 0.7962                      | 0.6879                       |
| Asthma                                            | 113(12.7%)             | 129(10.7%)             | 0.4845                      | 256(18.2%)              | 295(21.2%)             | 0.4527                      | 0.004                        |
| Tuberculosis                                      | 6(0.7%)                | 22(1.8%)               | 0.1386                      | 25(1.8%)                | 13(0.9%)               | 0.4232                      | 0.1757                       |

Data are mean(SD) or count(%). \* P values of difference tests between never smokers and ever smokers; Kruskal-Wallis test (without assumption of normal distribution of data) and chi-squared test are used for continuous variables and categorical variables, respectively. \*\* P values of difference tests between men and women in never smokers. <sup>#</sup>Calculated based on 6 sites with available biomass data. <sup>§</sup>Heart disease, systemic hypertension or diabetes. <sup>‡</sup>p values adjusted by Holm-Bonferroni correction.

**Table S2:** Characteristics, respiratory symptoms, self-reported physician diagnoses and occupational & domestic dust, gases and smoke exposures of never-smokers (N=2295) stratified into 3 subgroups: without and with chronic airflow obstruction (defined by FEV1/FVC<LLN) graded further into mild and moderate-severe disease by FEV1 % predicted  $\geq 80\%$  or  $<80\%$

|                                                   | <b>NonCOPD<br/>(FEV1/FVC<math>\geq</math>LLN)</b> | <b>COPD<br/>mild</b> | <b>COPD<br/>moderate</b> |
|---------------------------------------------------|---------------------------------------------------|----------------------|--------------------------|
| Subjects, No.( %)                                 | 2134                                              | 91(57%)              | 70(43%) <sup>†</sup>     |
| Age, yr, mean $\pm$ sd                            | 56.4 $\pm$ 11.0                                   | 59.6 $\pm$ 13.6      | 60.6 $\pm$ 10.8**        |
| Male gender                                       | 836(39.2)                                         | 27(29.7)             | 28(40.0)                 |
| Education, yr, mean $\pm$ sd                      | 16.1 $\pm$ 3.5                                    | 15.6 $\pm$ 4.0       | 15.2 $\pm$ 3.4           |
| BMI, kg/m <sup>2</sup> , mean $\pm$ sd            | 27.5 $\pm$ 5.7                                    | 26.9 $\pm$ 4.3       | 27.9 $\pm$ 5.7           |
| <b>Respiratory Symptoms</b>                       |                                                   |                      |                          |
| Chronic cough                                     | 181(8.5)                                          | 10(11.0)             | 20(28.6)**               |
| Chronic phlegm                                    | 128(6.0)                                          | 11(12.1)             | 14(20.0)**               |
| Wheezing                                          | 439(20.6)                                         | 30(33.0)             | 40(57.1)**               |
| Dyspnea on exertion                               | 402(18.8)                                         | 22(24.2)             | 34(48.6)**               |
| Any of the above symptoms                         | 816(38.2)                                         | 50(55.0)*            | 55(78.6)**               |
| Ever had to leave a job due to breathing problems | 63(3.0)                                           | 0(0)                 | 6(8.6)                   |
| <b>Physician diagnosis, ever</b>                  |                                                   |                      |                          |
| Asthma                                            | 312(14.6)                                         | 25(27.5)*            | 32(45.7)**               |
| COPD                                              | 13(0.6)                                           | 2(2.2)               | 7(10.1)**                |
| Chronic bronchitis                                | 55(2.6)                                           | 1(1.1)               | 11(15.9)**               |
| Emphysema                                         | 9(0.4)                                            | 1(1.1)               | 2(2.9)                   |
| Any of the above diagnosis                        | 347(16.3)                                         | 27(29.7)*            | 38(54.3)**               |
| Tuberculosis                                      | 27(1.3)                                           | 2(2.2)               | 2(2.9)                   |
| HD/HT/DM <sup>§</sup>                             | 673(31.5)                                         | 27(29.7)             | 28(40.0)                 |
| Stroke                                            | 45(2.1)                                           | 5(5.5)               | 0(0)                     |
| Childhood hospitalization for respiratory illness | 90(4.2)                                           | 7(7.7)               | 14(20.3)**               |
| <b>Exposures</b>                                  |                                                   |                      |                          |
| Passive smoking at home                           | 94(4.4)                                           | 8(8.8)               | 4(5.8)                   |
| Biomass cooking $\geq$ 10 yrs <sup>#</sup>        | 178(11.7)                                         | 11(16.9)             | 6(13.0)                  |
| Biomass heating $\geq$ 10 yrs <sup>#</sup>        | 221(14.6)                                         | 13(20.0)             | 11(23.9)                 |
| Organic dust                                      | 182(8.5)                                          | 14(15.4)             | 6(8.6)                   |
| Inorganic dust                                    | 41(1.9)                                           | 5(5.5)               | 0(0)                     |
| Gases/Vapours                                     | 79(3.7)                                           | 4(4.4)               | 6(8.6)                   |
| Worked in any dusty job >1 yr                     | 504(23.6)                                         | 24(26.4)             | 19(27.5)                 |

Data are mean $\pm$ sd or count(%). <sup>§</sup>Heart disease, systemic hypertension or diabetes. <sup>#</sup>Calculated based on 6 sites with available biomass data. Significance measured on 5% level after Holm-Bonferroni correction; \*COPD mild vs.

NonCOPD; \*\*COPD moderate-severe vs. NonCOPD. <sup>†</sup> significantly smaller proportion compared with ever smokers in Table S2.

**Table S3:** Characteristics, respiratory symptoms, self-reported physician diagnoses and occupational & domestic dust, gases and smoke exposures of ever-smokers (N=2598) stratified into 3 subgroups: without and with chronic airflow obstruction (defined by FVE1/FVC<LLN) graded further into mild and moderate-severe disease by FEV1 % predicted  $\geq 80\%$  or  $< 80\%$

|                                                   | <b>NonCOPD<br/>(FEV1/FVC<math>\geq</math>LLN)</b> | <b>COPD<br/>mild</b> | <b>COPD<br/>moderate</b> |
|---------------------------------------------------|---------------------------------------------------|----------------------|--------------------------|
| Subjects, No. (%)                                 | 2202                                              | 151(38%)             | 245(62%) <sup>†</sup>    |
| Age, yr, mean $\pm$ sd                            | 57.4 $\pm$ 10.8                                   | 60.0 $\pm$ 10.8*     | 64.4 $\pm$ 11.3**        |
| Male gender                                       | 1019(46.3)                                        | 73(48.3)             | 113(46.1)                |
| Education, yr, mean $\pm$ sd                      | 15.0 $\pm$ 3.4                                    | 14.7 $\pm$ 3.7       | 13.5 $\pm$ 3.5**         |
| BMI, kg/m <sup>2</sup> , mean $\pm$ sd            | 28.3 $\pm$ 6.0                                    | 27.1 $\pm$ 4.9       | 28.4 $\pm$ 6.2           |
| <b>Respiratory Symptoms</b>                       |                                                   |                      |                          |
| Chronic cough                                     | 296(13.4)                                         | 30(19.8)             | 88(35.9)**               |
| Chronic phlegm                                    | 219(10.0)                                         | 24(15.9)             | 79(32.2)**               |
| Wheezing                                          | 680(30.9)                                         | 75(49.7)*            | 154(62.9)**              |
| Dyspnea on exertion                               | 545(24.8)                                         | 45(29.8)             | 122(49.8)**              |
| Any of the above symptoms                         | 1113(50.5)                                        | 106(70.2)*           | 203(82.9)**              |
| Ever had to leave a job due to breathing problems | 79(3.6)                                           | 3(2.0)               | 16(6.5)                  |
| <b>Physician diagnosis, ever</b>                  |                                                   |                      |                          |
| Asthma                                            | 303(13.8)                                         | 39(25.8)*            | 82(33.5)**               |
| COPD                                              | 38(1.7)                                           | 10(6.6)*             | 52(21.2)**               |
| Chronic bronchitis                                | 114(5.2)                                          | 19(12.6)*            | 50(20.4)**               |
| Emphysema                                         | 34(1.5)                                           | 6(4.0)               | 40(16.3)**               |
| Any of the above diagnosis                        | 394(17.9)                                         | 55(36.4)*            | 134(54.7)**              |
| Tuberculosis                                      | 27(1.2)                                           | 3(2.0)               | 5(2.0)                   |
| HD/HT/DM <sup>§</sup>                             | 815(37.0)                                         | 61(40.4)             | 123(50.2)**              |
| Stroke                                            | 59(2.7)                                           | 2(1.3)               | 10(4.1)                  |
| Childhood hospitalization for respiratory illness | 134(6.1)                                          | 15(10.0)             | 24(9.8)                  |
| <b>Exposures</b>                                  |                                                   |                      |                          |
| Passive smoking at home                           | 288(13.1)                                         | 31(20.5)             | 42(17.1)                 |
| Biomass cooking $\geq 10$ yrs <sup>#</sup>        | 181(12.7)                                         | 13(12.0)             | 32(18.4)                 |
| Biomass heating $\geq 10$ yrs <sup>#</sup>        | 256(17.9)                                         | 17(15.7)             | 40(23.0)                 |
| Organic dust                                      | 196(8.9)                                          | 13(8.6)              | 34(13.9)                 |
| Inorganic dust                                    | 91(4.1)                                           | 7(4.6)               | 14(5.7)                  |
| Gases/Vapours                                     | 126(5.7)                                          | 10(6.6)              | 19(7.8)                  |
| Worked in any dusty job >1 yr                     | 679(30.8)                                         | 56(37.1)             | 105(42.9)**              |

Data are mean $\pm$ sd or count(%). <sup>§</sup>Heart disease, systemic hypertension or diabetes. <sup>#</sup>Calculated based on 6 sites with available biomass data. Significance measured on 5% level after Holm-Bonferroni correction; \*COPD mild vs. NonCOPD; \*\*COPD moderate-severe vs. NonCOPD. <sup>†</sup>significantly greater than that for never-smokers in table 2.

**Table S4 (source for Fig 2,3,4 in manuscript):** Comparison of Clinical, physiological and structural phenotypes of COPD (defined by LLN) in never-smokers with ever-smokers

|                                               | Never-smoker           |      |                        |       | Ever-smoker            |      |                          |          |
|-----------------------------------------------|------------------------|------|------------------------|-------|------------------------|------|--------------------------|----------|
|                                               | NonCOPD                | %    | COPD                   | %     | NonCOPD                | %    | COPD                     | %        |
| <b>N=835</b>                                  | <b>308</b>             | -    | <b>86</b>              | -     | <b>273</b>             | -    | <b>168</b>               | -        |
| Men                                           | 163                    | 52.9 | 32                     | 37.2* | 152                    | 55.7 | 77                       | 45.8     |
| Emphysema                                     | 32                     | 10.4 | 11                     | 12.8  | 71                     | 26.0 | 92                       | 54.8**;# |
| Emphysema score,<br>mean(95% CI)              | 0.22<br>(0.14,0.30)    | -    | 0.33<br>(0.08,0.57)    | -     | 0.67<br>(0.50,0.83)    | -    | 2.40**;#<br>(1.91,2.89)  | -        |
| Bronchiolitis                                 | 23                     | 7.5  | 10                     | 11.6  | 44                     | 16.1 | 26                       | 15.5     |
| Bronchiolitis score,<br>mean(95% CI)          | 0.16<br>(0.09,0.22)    | -    | 0.28<br>(0.11,0.45)    | -     | 0.34<br>(0.25,0.44)    | -    | 0.35<br>(0.22,0.47)      | -        |
| Bronchiectasis                                | 65                     | 21.1 | 23                     | 26.7  | 58                     | 21.3 | 40                       | 23.8     |
| <b>N=4890</b>                                 | <b>2131</b>            | -    | <b>161</b>             | -     | <b>2202</b>            | -    | <b>396</b>               | -        |
| Dyspnea score,<br>mean(95% CI)                | 1.28<br>(1.25,1.31)    | -    | 1.57*<br>(1.43,1.72)   | -     | 1.39<br>(1.36,1.43)    | -    | 1.88**;#<br>(1.76,2.00)  | -        |
| Dyspnea on exertion                           | 402                    | 18.9 | 56                     | 34.8* | 545                    | 24.8 | 167                      | 42.2**   |
| Wheeze                                        | 438                    | 20.6 | 69                     | 42.9* | 680                    | 30.9 | 229                      | 57.8**;# |
| Chronic cough                                 | 181                    | 8.5  | 30                     | 18.6* | 296                    | 13.4 | 118                      | 29.8**;# |
| Chronic Phlegm                                | 128                    | 6.0  | 25                     | 15.5* | 219                    | 10.0 | 103                      | 26.0**;# |
| Exacerbation                                  | 387                    | 18.2 | 55                     | 34.2* | 450                    | 20.4 | 112                      | 28.3**   |
| Asthma                                        | 312                    | 14.6 | 57                     | 35.4* | 303                    | 13.8 | 121                      | 30.6**   |
| <b>N=977</b>                                  | <b>346</b>             | -    | <b>110</b>             | -     | <b>312</b>             | -    | <b>209</b>               | -        |
| BDR <sub>1</sub> (%)<br>mean(95% CI)          | 4.86<br>(4.47,5.25)    | -    | 9.43*<br>(7.68,11.18)  | -     | 5.14<br>(4.46,5.63)    | -    | 9.29**<br>(8.09,10.43)   | -        |
| VC(L)<br>mean(95% CI)                         | 3.78<br>(3.67,3.89)    | -    | 3.62<br>(3.41,3.83)    | -     | 3.64<br>(3.53,3.75)    | -    | 3.56<br>(3.42,3.70)      | -        |
| TLC(L)<br>mean(95% CI)                        | 5.95<br>(5.81,6.10)    | -    | 6.10<br>(5.84,6.35)    | -     | 5.95<br>(5.81,6.09)    | -    | 6.39**;#<br>(6.20,6.57)  | -        |
| RV(L)<br>mean(95% CI)                         | 2.19<br>(2.13,2.25)    | -    | 2.47*<br>(2.33,2.61)   | -     | 2.30<br>(2.24,2.37)    | -    | 2.83**;#<br>(2.72,2.94)  | -        |
| FRC(L)<br>mean(95% CI)                        | 3.15<br>(3.06,3.23)    | -    | 3.35<br>(3.19,3.51)    | -     | 3.17<br>(3.09,3.26)    | -    | 3.69**;#<br>(3.57,3.82)  | -        |
| ERV(L)<br>mean(95% CI)                        | 0.95<br>(0.89,1.01)    | -    | 0.87<br>(0.77,0.96)    | -     | 0.87<br>(0.81,0.92)    | -    | 0.85<br>(0.78,0.91)      | -        |
| IC(L)<br>mean(95% CI)                         | 2.81<br>(2.73,2.89)    | -    | 2.73<br>(2.56,2.91)    | -     | 2.77<br>(2.69,2.86)    | -    | 2.70<br>(2.59,2.81)      | -        |
| RAW(cmH <sub>2</sub> O/L/sec)<br>mean(95% CI) | 2.20<br>(2.07,2.33)    | -    | 3.28*<br>(2.91,3.65)   | -     | 2.41<br>(2.24,2.58)    | -    | 3.22**<br>(3.01,3.44)    | -        |
| MIP(cmH <sub>2</sub> O)<br>mean(95% CI)       | 77.6<br>(74.6,80.7)    | -    | 83.0<br>(76.1,89.9)    | -     | 76.8<br>(73.6,80.0)    | -    | 76.6<br>(72.6,80.5)      | -        |
| MEP(cmH <sub>2</sub> O)<br>mean(95% CI)       | 110.0<br>(105.5,114.5) | -    | 116.6<br>(105.7,127.5) | -     | 108.9<br>(104.1,113.7) | -    | 110.5<br>(105.0,115.9)   | -        |
| DLCO/VA (ml/min/mmHg/L)<br>mean(95% CI)       | 4.15<br>(4.07,4.24)    | -    | 4.12<br>(3.97,4.26)    | -     | 3.92<br>(3.83,4.00)    | -    | 3.64**;#<br>(3.53,3.75)  | -        |
| FRC/TLC(%)<br>Mean(95% CI)                    | 0.53<br>(0.52,0.54)    | -    | 0.55*<br>(0.54,0.57)   | -     | 0.54<br>(0.53,0.54)    | -    | 0.58**;#<br>(0.57,0.59)  | -        |
| DLCO(ml/min/mmHg)<br>mean(95% CI)             | 21.60<br>(20.9,22.3)   | -    | 21.60<br>(20.1,23.1)   | -     | 20.40<br>(19.6,21.1)   | -    | 18.74**;#<br>(17.9,19.6) | -        |
| RV/TLC(%)<br>mean(95% CI)                     | 0.37<br>(0.37,0.38)    | -    | 0.41*<br>(0.39,0.43)   | -     | 0.39<br>(0.38,0.40)    | -    | 0.45**<br>(0.43,0.46)    | -        |

Data are mean(95% CI) or count and %. \*Significant difference between never-smoker NonCOPD and never-smoker COPD. \*\*Significant difference between ever-smoker NonCOPD and ever-smoker COPD. #Significant difference between COPD never-smoker and COPD ever-smoker. P values adjusted after Holm-Bonferroni correction.

Exacerbation= Yes to question “ever had a period when breathing problems got so bad that they interfered with usual daily activities or resulted in missing work.

**Table X2 ( detailed version of Table 2 in manuscript )** : aOR for independent predictors associated with risk of different severity of COPD defined by LLN in male and female never smokers

| Variables                                         | COPD mild         |                  |                  | COPD moderate-severe |                     |                     |
|---------------------------------------------------|-------------------|------------------|------------------|----------------------|---------------------|---------------------|
|                                                   | All<br>N=2225     | Men<br>N=863     | Women<br>N=1362  | All<br>N=2204        | Men<br>N=864        | Women<br>N=1340     |
| Sex                                               | 0.64(0.38,1.05)   | -                | -                | 1.21(0.70,2.09)      | -                   | -                   |
| <b>Age</b>                                        |                   |                  |                  |                      |                     |                     |
| 40-49                                             | Ref               | Ref              | Ref              | Ref                  | Ref                 | Ref                 |
| 50-59                                             | 0.85(0.48,1.54)   | 0.87(0.28,2.70)  | 0.91(0.45,1.82)  | 2.52(1.17,5.44)*     | 4.13(1.12,15.2)*    | 1.78(0.67,4.71)     |
| 60-69                                             | 1.13(0.60,2.12)   | 0.48(0.11,2.04)  | 1.52(0.74,3.11)  | 3.15(1.41,7.02)*     | 5.38(1.35,21.3)*    | 2.27(0.82,6.28)     |
| 70+                                               | 2.19(1.15,4.16)*  | 2.50(0.77,8.16)  | 2.28(1.02,5.06)* | 4.46(1.84,10.8)**    | 6.09(1.14,35.4)*    | 3.54(1.23,10.1)*    |
| BMI                                               | 0.97(0.93,1.02)   | 0.98(0.89,1.08)  | 0.98(0.93,1.03)  | 0.98(0.93,1.03)      | 1.01(0.92,1.10)     | 0.97(0.92,1.03)     |
| Education                                         | 0.98(0.92,1.04)   | 0.88(0.78,0.99)* | 1.02(0.95,1.11)  | 0.95(0.88,1.02)      | 0.96(0.83,1.10)     | 0.94(0.86,1.03)     |
| <b>Exposures</b>                                  |                   |                  |                  |                      |                     |                     |
| Organic dust                                      | 1.69(0.89,3.20)   | 2.08(0.81,5.33)  | 1.27(0.49,3.36)  | 0.85(0.35,2.09)      | 0.91(0.23,3.67)     | 0.92(0.27,3.16)     |
| Inorganic dust                                    | 2.94(0.99,8.71)   | 3.24(0.99,10.57) | NC               | NC                   | NC                  | NC                  |
| Gases/Vapours                                     | 0.92(0.30,2.83)   | 1.14(0.32,3.99)  | NC               | 2.25(0.83,6.08)      | 2.40(0.69,8.41)     | 1.72(0.20,14.9)     |
| <i>Biomass fuel</i>                               |                   |                  |                  |                      |                     |                     |
| ≥10 yrs cooking <sup>#</sup>                      | 1.06(0.46,2.46)   | 0.70(0.16,2.98)  | 1.13(0.39,3.29)  | 0.67(0.23,1.94)      | 1.74(0.32,9.34)     | 0.55(0.18,1.65)     |
| ≥10 yrs heating <sup>#</sup>                      | 0.88(0.39,1.96)   | 2.09(0.59,7.44)  | 0.62(0.21,1.82)  | 2.26(0.93,5.52)      | 0.44(0.08,2.42)     | 3.58(1.42,9.01)**   |
| Passive smoking                                   | 2.18(0.99,4.75)   | 1.33(0.26,6.72)  | 2.60(1.05,6.43)* | 1.25(0.42,3.73)      | 0.69(0.08,6.21)     | 1.65(0.46,5.88)     |
| Childhood Hospitalization for respiratory illness | 1.57(0.68,3.62)   | 2.95(0.84,10.4)  | 1.18(0.35,4.00)  | 4.80(2.43,9.46)****  | 10.1(3.71,27.5)**** | 2.24(0.73,6.84)     |
| <b>Co-morbidities, ever</b>                       |                   |                  |                  |                      |                     |                     |
| HD/HT/DM <sup>§</sup>                             | 0.72(0.43,1.21)   | 1.55(0.61,3.95)  | 0.51(0.26,0.98)* | 1.11(0.63,1.94)      | 1.48(0.57,3.90)     | 1.07(0.53,2.16)     |
| Asthma                                            | 2.23(1.36,3.66)** | 3.39(1.25,9.21)* | 2.14(1.20,3.82)* | 4.94(2.94,8.30)****  | 7.34(3.01,17.9)**** | 3.89(2.02,7.50)**** |
| Tuberculosis                                      | 1.20(0.27,5.36)   | NC               | 1.67(0.37,7.63)  | 1.64(0.35,7.69)      | NC                  | 2.02(0.41,9.79)     |

Data are adjusted odds ratios and 95% CI. Adjustment made for all other covariates in the model. <sup>#</sup>Calculated based on 6 sites with available biomass data. <sup>§</sup>Heart disease, hypertension or diabetes. Significant on different levels: \*0.05; \*\*0.01; \*\*\*0.001; \*\*\*\*≤0.0001. NC=counts too small for accurate estimate.



**Table X3 (detailed version of Table 3 in manuscript):** aOR for independent predictors associated with risk of different severity of COPD defined by LLN in male and female ever-smokers

| Variables                                         | COPD mild           |                     |                   | COPD moderate-severe |                      |                      |
|---------------------------------------------------|---------------------|---------------------|-------------------|----------------------|----------------------|----------------------|
|                                                   | All<br>N=2353       | Men<br>N=1092       | Women<br>N=1261   | All<br>N=2447        | Men<br>N=1132        | Women<br>N=1315      |
| Sex                                               | 1.17(0.84,1.67)     | -                   | -                 | 1.03(0.76,1.42)      | -                    | -                    |
| <b>Age</b>                                        |                     |                     |                   |                      |                      |                      |
| 40-49                                             | Ref                 | Ref                 | Ref               | Ref                  | Ref                  | Ref                  |
| 50-59                                             | 1.40(0.84,2.31)     | 1.05(0.48,2.30)     | 1.65(0.85,3.21)   | 2.35(1.39,3.99)**    | 1.59(0.76,3.33)      | 3.42(1.57,7.43)**    |
| 60-69                                             | 2.21(1.31,3.75)*    | 3.02(1.40,6.52)**   | 1.66(0.80,3.45)   | 4.16(2.44,7.11)****  | 2.68(1.23,6.38)**    | 6.41(2.93,14.0)****  |
| 70+                                               | 3.01(1.66,5.46)**** | 4.19(1.75,10.0)**** | 2.23(0.96,5.21)   | 11.58(6.58,20.4)**** | 11.27(5.01,25.4)**** | 12.64(5.48,29.2)**** |
| BMI                                               | 0.95(0.92,0.98)**   | 0.94(0.89,0.99)     | 0.95(0.91,0.99)*  | 0.99(0.96,1.01)      | 0.97(0.93,1.02)      | 0.99(0.96,1.02)      |
| Current smoking (vs. former)                      | 1.73(1.15,2.62)*    | 2.52(1.34,4.71)**   | 1.33(0.76,2.32)   | 2.89(2.04,4.10)****  | 3.61(2.04,6.38)****  | 2.53(1.61,3.98)****  |
| <b>Pack years</b>                                 |                     |                     |                   |                      |                      |                      |
| 0-10                                              | Ref                 | Ref                 | Ref               | Ref                  | Ref                  | Ref                  |
| 10-20                                             | 2.03(1.18,3.49)*    | 2.07(0.86,4.96)     | 2.12(1.06,4.23)*  | 1.32(0.75,2.32)      | 0.86(0.34,2.14)      | 1.69(0.81,3.52)      |
| 20+                                               | 2.52(1.53,4.14)*    | 2.58(1.18,5.61)*    | 2.52(1.31,4.83)*  | 3.57(2.26,5.62)****  | 2.82(1.43,5.58)****  | 4.16(2.24,7.73)****  |
| Education                                         | 1.00(0.96,1.05)     | 1.02(0.95,1.10)     | 0.98(0.91,1.05)   | 0.94(0.90,0.98)**    | 0.94(0.86,0.99)*     | 0.93(0.88,0.99)*     |
| <b>Exposures</b>                                  |                     |                     |                   |                      |                      |                      |
| Organic dust                                      | 0.84(0.45,1.57)     | 0.90(0.43,1.89)     | 0.60(0.18,2.04)   | 1.36(0.86,2.13)      | 1.16(0.64,2.10)      | 1.73(0.83,3.60)      |
| Inorganic dust                                    | 0.80(0.33,1.93)     | 0.75(0.28,2.01)     | 1.22(0.11,13.2)   | 0.65(0.32,1.29)      | 0.55(0.25,1.21)      | 1.45(0.23,9.12)      |
| Gases/Vapours                                     | 0.98(0.47,2.05)     | 0.81(0.33,2.03)     | 1.29(0.34,4.88)   | 1.07(0.59,1.95)      | 1.34(0.67,2.67)      | 0.53(0.13,2.08)      |
| <i>Biomass fuel</i>                               |                     |                     |                   |                      |                      |                      |
| ≥10 yrs cooking <sup>#</sup>                      | 0.99(0.46,2.15)     | 0.42(0.13,1.35)     | 2.02(0.72,5.63)   | 0.81(0.44,1.48)      | 0.74(0.31,1.81)      | 0.83(0.35,1.96)      |
| ≥10 yrs heating <sup>#</sup>                      | 0.65(0.33,1.28)     | 1.02(0.41,2.55)     | 0.44(0.16,1.17)   | 0.81(0.47,1.38)      | 0.72(0.32,1.63)      | 0.91(0.44,1.86)      |
| Passive smoking at home                           | 1.36(0.86,2.78)     | 1.50(0.77,2.93)     | 1.25(0.66,2.38)   | 1.12(0.59,1.34)      | 0.80(0.42,1.52)      | 0.95(0.55,1.36)      |
| Childhood hospitalization for respiratory illness | 1.54(0.86,2.78)     | 1.34(0.52,3.44)     | 1.90(0.88,4.10)   | 1.65(0.98,2.77)      | 1.70(0.78,3.69)      | 1.51(0.73,3.12)      |
| <b>Co-morbidities, ever</b>                       |                     |                     |                   |                      |                      |                      |
| HD/HT/DM <sup>§</sup>                             | 0.97(0.66,1.42)     | 0.85(0.49,1.48)     | 1.10(0.64,1.88)   | 0.98(0.71,1.34)      | 1.11(0.69,1.80)      | 0.87(0.57,1.35)      |
| Asthma                                            | 2.51(1.67,3.76)**** | 2.74(1.41,5.33)**   | 2.25(1.33,3.82)** | 3.82(2.72,5.35)****  | 4.58(2.64,7.95)****  | 3.22(2.08,4.96)****  |
| Tuberculosis                                      | 1.70(0.50,5.85)     | 3.36(0.89,12.7)     | NC                | 1.84(0.66,5.16)      | 1.54(0.39,6.09)      | 2.57(0.49,13.3)      |
| Lung cancer                                       | 1.45(0.33,6.62)     | 0.94(0.11,8.12)     | 2.43(0.28,21.22)  | 2.85(1.06,7.66)      | 2.20(0.57,8.48)      | 3.79(0.90,16.00)     |

Data are adjusted odds ratios and 95% CI. Adjustment made for all other covariates in the model. <sup>#</sup>Calculated based on 6 sites with available biomass data. <sup>§</sup>Heart disease, hypertension or diabetes. Significant on different levels: \*0.05; \*\*0.01; \*\*\*0.001; \*\*\*\*≤0.0001. \*HD/HT/DM is heart disease, systemic hypertension, or diabetes. NC=counts too small for accurate estimate.

**Table S3.1:** Comparison of sex, age and respiratory medication use of COPD (define by LLN) in never-smokers with ever-smokers

|                                              | Never-smoker |      |             |       | Ever-smoker |      |             |       |
|----------------------------------------------|--------------|------|-------------|-------|-------------|------|-------------|-------|
|                                              | NonCOPD      | %    | COPD        | %     | NonCOPD     | %    | COPD        | %     |
| <b>N=4890</b>                                | <b>2131</b>  | -    | <b>161</b>  | -     | <b>2202</b> | -    | <b>396</b>  | -     |
| Men                                          | 836          | 39.2 | 55          | 34.2  | 1019        | 46.3 | 186         | 47.0# |
| Age                                          | 56.4         |      | 60.0*       |       | 57.4        |      | 62.7*#      |       |
| (95% CI)                                     | (56.0,56.9)  | -    | (58.1,61.9) | -     | (56.9,57.8) | -    | (61.6,63.8) | -     |
| <b><u>Use of respiratory medications</u></b> | 670          | 31.4 | 76          | 47.5* | 665         | 32.0 | 190         | 48.0* |
| Prescribed medication                        | 353          | 16.5 | 63          | 39.1* | 378         | 17.2 | 156         | 39.4* |
| Bronchodilator                               | 219          | 10.3 | 53          | 32.9* | 235         | 10.7 | 138         | 34.9* |
| Inhaled steroid                              | 279          | 13.1 | 53          | 32.9* | 305         | 13.9 | 123         | 31.1* |
| Oral steroid                                 | 4            | 0.2  | 6           | 3.7*  | 9           | 0.4  | 1           | 0.3#  |
| Anti-inflammatory (other)                    | 10           | 0.5  | 6           | 3.7*  | 17          | 0.8  | 4           | 1.0   |
| OTC <sup>s</sup> medication                  | 294          | 13.8 | 12          | 7.5*  | 259         | 11.8 | 31          | 7.8*  |

Data are count and % or mean(95% CI). \*Significant difference between never-smoker NonCOPD and never-smoker COPD. \*\*Significant difference between ever-smoker NonCOPD and ever-smoker COPD. #Significant difference between COPD never-smoker and COPD ever-smoker. P values adjusted after Holm-Bonferroni correction.

**Comments:** Respiratory Medication use was more frequent in COPD than in non-COPD individuals in both never-smokers and ever-smokers.

**Figure S1: Weighted prevalence of COPD by sex and by severity of COPD** and by two definitions [ by FR(GOLD definition: FEV1/FVC<0.7) and by LLN ( FEV1/FVC<5<sup>th</sup> percentile).] Key: M= men; F=women. Pale grey section = mild COPD( FEV1%pred ≥80%) ; Dark grey Column=moderate-severe( FEV1%pred<80%).

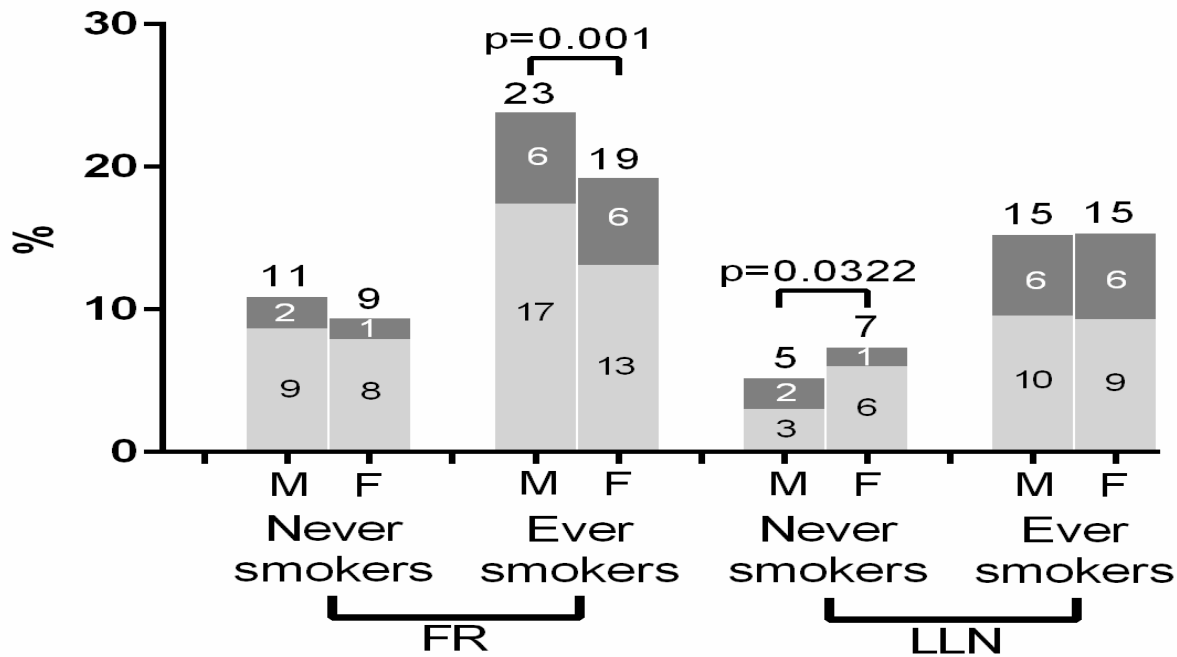

**Comments:** The prevalence defined by Fixed Ratio ( FEV1/FVC<0.7) is higher than COPD defined by LLN ( FEV1/FVC<LLN). This is as expected and has been shown in many published studies. It is interesting that there is a female bias for COPD in never-smoker and no sex bias for COPD in ever-smokers when LLN criteria COPD is used. The reverse is true when the fixed ratio criteria for COPD is used: there is a male bias for COPD in ever-smokers and no sex bias for COPD in never smokers. It is unclear from these results which definition is superior.

**Figure S2:** Comparison of proportions of subjects with respiratory symptoms & outcomes in never-smoker with moderate-severe COPD ( grey column) and ever-smokers with moderate - severe COPD( black column) using GOLD (FR) criteria ( top section) and LLN criteria ( bottom section). No significance difference between never-smoking COPD and ever-smoking COPD when the condition is moderate-severe.

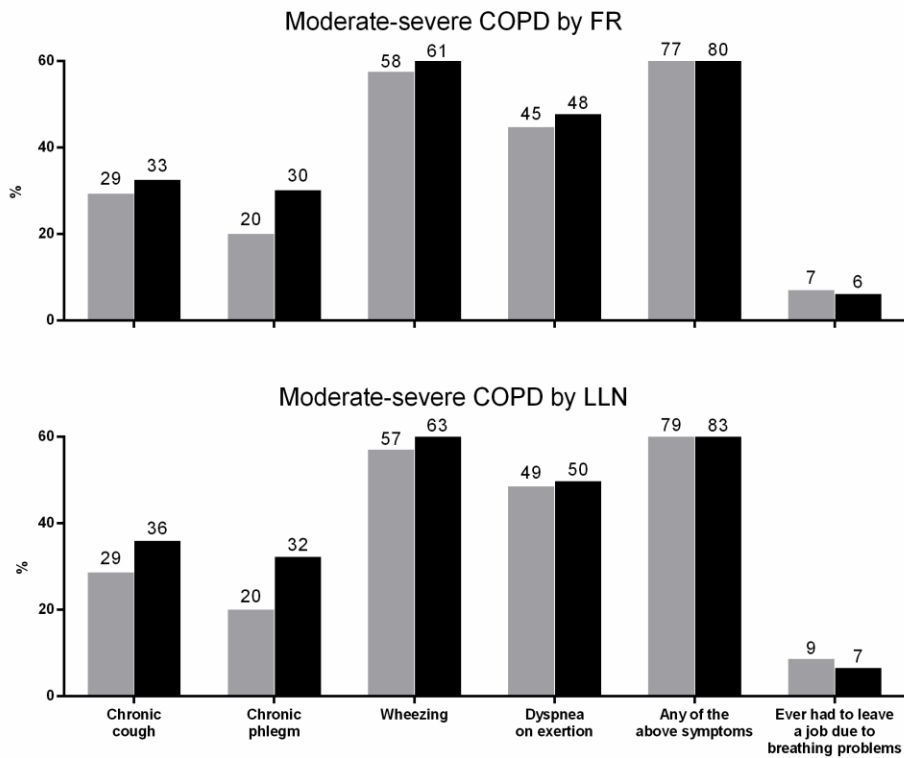

Supplement: thoraxjnl-2015-206938supp.pdf [file thoraxjnl-2015-206938supp.pdf]
